# Supplementary material for: Comparison of mutations in human parainfluenza viruses during passage in primary human bronchial/tracheal epithelial air-liquid interface cultures and cell lines
Source: PubMed Central journal article supplement (PMC11370246; doi:10.1128/spectrum.01164-24), 2024-07-30
Supplement: spectrum.01164-24-s0001.pdf [file spectrum.01164-24-s0001.pdf]

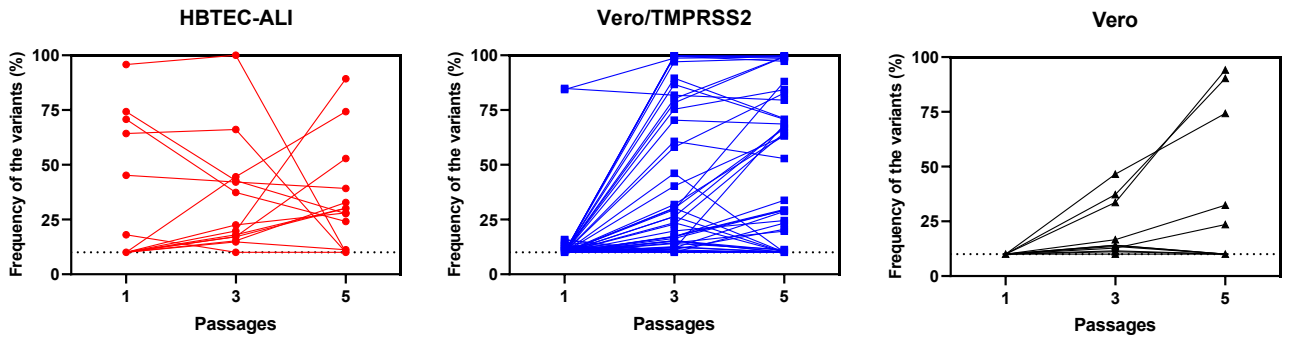

**Fig. S1. Change in the variant frequency occurred at P1 and P3.**

The nucleotide mutations which occurred at P1 and P3 were followed and the change in the variant frequency of each mutation were shown in a line. The dotted line represents 10% of the detection threshold.

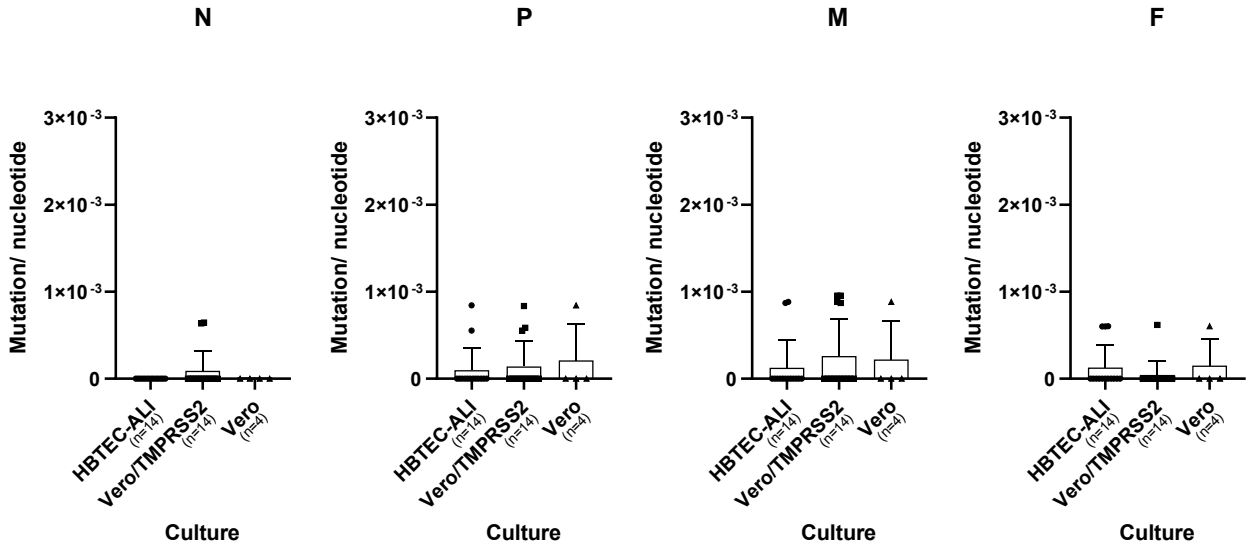

**Fig. S2. Mutation rate in each gene.**

The mutation rate of each gene after five blind passages in different cultures. “n” indicates the number of isolates used in the study. Statistics were calculated using Tukey’s multiple comparisons test ( $*P < 0.05$ ), and there were no significant difference in *N*, *P*, *M* and *F*.

**Table S1.** Viral genome copy numbers at each passage

| Culture (passage)                    | Species                                                               | Name                                  | Log (genome copy numbers/mL) |      |      |      |      |      |      |      |      |      |
|--------------------------------------|-----------------------------------------------------------------------|---------------------------------------|------------------------------|------|------|------|------|------|------|------|------|------|
|                                      |                                                                       |                                       | Wash                         | P1   | Wash | P2   | Wash | P3   | Wash | P4   | Wash | P5   |
| HBTEC-ALI                            | Respirovirus laryngotracheitidis<br>(Human parainfluenza virus 1)     | PIV1_Fukushima_O77_2018 (LC764863)    | 3.6                          | 8.2  | 4.6  | 7.5  | 4.8  | 8.1  | 4.3  | 6.6  | 3.7  | 7.3  |
|                                      |                                                                       | PIV1_Fukushima_H171_2018 (LC764862)   | 3.4                          | 7.5  | 3.0  | 6.6  | 4.4  | 8.9  | 4.5  | 7.2  | 4.0  | 8.3  |
|                                      |                                                                       | PIV1_Fukushima_O425_2018 (LC764864)   | 3.4                          | 7.5  | 3.4  | 6.2  | 4.4  | 8.8  | 4.3  | 7.2  | 3.9  | 8.5  |
|                                      | Orthorubulavirus laryngotracheitidis<br>(Human parainfluenza virus 2) | PIV1_Fukushima_O503_2019 (LC764865)   | 4.1                          | 8.3  | 4.4  | 6.7  | 4.8  | 8.6  | 4.9  | 7.3  | 4.5  | 9.1  |
|                                      |                                                                       | PIV2_Fukushima_O13_2018 (LC720864)    | ND                           | 10.1 | 2.9  | 8.7  | 6.3  | 9.6  | 6.2  | 8.3  | 5.9  | 9.3  |
|                                      |                                                                       | PIV2_Fukushima_O33_2018 (LC720865)    | ND                           | 10.0 | 6.3  | 9.1  | 6.2  | 9.6  | 5.7  | 8.5  | 4.5  | 9.3  |
|                                      |                                                                       | PIV2_Fukushima_O836_2019 (LC720868)   | 5.2                          | 9.9  | 6.0  | 9.0  | 6.1  | 9.5  | 5.8  | 8.4  | 4.5  | 9.3  |
|                                      | Respirovirus pneumoniae<br>(Human parainfluenza virus 3)              | PIV2_Fukushima_O861_2019 (LC720869)   | 5.3                          | 9.9  | 5.5  | 9.1  | 5.9  | 9.9  | 5.7  | 9.4  | 5.6  | 10.1 |
|                                      |                                                                       | PIV3_Fukushima_O330_2018 (LC720876)   | 5.8                          | 11.1 | 7.9  | 9.5  | 7.5  | 11.0 | 7.5  | 9.2  | 5.8  | 10.7 |
|                                      | Orthorubulavirus hominis<br>(Human parainfluenza virus 4)             | PIV3_Fukushima_O644_2019 (LC720877)   | 5.1                          | 10.9 | 7.2  | 9.7  | 7.4  | 11.0 | 7.4  | 9.4  | 6.0  | 10.8 |
|                                      |                                                                       | PIV3_Fukushima_O726_2019 (LC720879)   | ND                           | 10.5 | 6.8  | 9.4  | 7.0  | 10.7 | 7.1  | 9.3  | 5.9  | 10.5 |
|                                      |                                                                       | PIV4a_Fukushima_H725_2019 (LC706553)  | 3.3                          | 6.4  | ND   | 6.6  | 3.2  | 8.6  | 4.4  | 7.1  | 2.6  | 8.2  |
| Vero/TMPRSS2                         | Respirovirus laryngotracheitidis<br>(Human parainfluenza virus 1)     | PIV4b_Fukushima_O896_2019 (LC706554)  | 2.6                          | 7.8  | 3.7  | 7.2  | 3.8  | 7.9  | 3.1  | 6.2  | 2.6  | 7.8  |
|                                      |                                                                       | PIV4b_Fukushima_OR476_2022 (LC706556) | 3.4                          | 8.1  | 3.4  | 7.9  | 2.9  | 8.6  | 3.5  | 7.6  | ND   | 9.0  |
| Vero                                 | Respirovirus laryngotracheitidis<br>(Human parainfluenza virus 1)     | PIV1_Fukushima_O77_2018 (LC764863)    | 5.0                          | 6.3  | 4.4  | 5.8  | 4.8  | 6.1  | 4.7  | 5.4  | 5.0  | 6.0  |
|                                      |                                                                       | PIV1_Fukushima_H171_2018 (LC764862)   | 4.2                          | 6.4  | NT   | 6.2  | NT   | 7.6  | NT   | 7.5  | 6.0  | 8.1  |
|                                      |                                                                       | PIV1_Fukushima_O425_2018 (LC764864)   | 4.1                          | 6.3  | NT   | 6.8  | NT   | 7.6  | NT   | 7.5  | 5.5  | 8.0  |
|                                      |                                                                       | PIV1_Fukushima_O503_2019 (LC764865)   | 3.8                          | 6.4  | NT   | 6.9  | NT   | 8.8  | NT   | 6.2  | 4.3  | 7.7  |
|                                      | Orthorubulavirus laryngotracheitidis<br>(Human parainfluenza virus 2) | PIV2_Fukushima_O13_2018 (LC720864)    | 6.5                          | 8.7  | 4.3  | 9.0  | 6.0  | 9.0  | 4.6  | 8.2  | 5.6  | 8.4  |
|                                      |                                                                       | PIV2_Fukushima_O33_2018 (LC720865)    | 6.2                          | 8.6  | 3.8  | 8.9  | 5.5  | 9.1  | 3.9  | 9.0  | 5.6  | 8.6  |
|                                      |                                                                       | PIV2_Fukushima_O836_2019 (LC720868)   | 6.5                          | 8.6  | ND   | 8.6  | 5.7  | 9.0  | 4.9  | 7.9  | 5.7  | 8.5  |
|                                      |                                                                       | PIV2_Fukushima_O861_2019 (LC720869)   | 6.0                          | 7.9  | NT   | 8.3  | NT   | 8.6  | NT   | 8.5  | 6.2  | 8.9  |
|                                      | Respirovirus pneumoniae<br>(Human parainfluenza virus 3)              | PIV3_Fukushima_O330_2018 (LC720876)   | 7.2                          | 8.3  | 7.5  | 10.2 | 7.9  | 11.0 | 7.8  | 10.6 | 7.8  | 10.8 |
|                                      |                                                                       | PIV3_Fukushima_O644_2019 (LC720877)   | 6.1                          | 7.7  | 6.8  | 8.8  | 5.7  | 9.0  | 5.5  | 8.4  | 6.5  | 9.6  |
|                                      | Orthorubulavirus hominis<br>(Human parainfluenza virus 4)             | PIV3_Fukushima_O726_2019 (LC720879)   | 7.1                          | 9.6  | 5.3  | 10.3 | 7.9  | 10.7 | 7.3  | 10.4 | 8.0  | 10.7 |
|                                      |                                                                       | PIV4a_Fukushima_H725_2019 (LC706553)  | 4.4                          | 5.1  | NT   | 4.8  | NT   | 7.1  | NT   | 6.0  | 3.8  | 7.0  |
| PIV4b_Fukushima_O896_2019 (LC706554) |                                                                       | 3.3                                   | 4.1                          | ND   | 4.7  | 4.6  | 6.6  | 3.2  | 6.4  | 3.1  | 7.5  |      |
| Vero                                 | Orthorubulavirus laryngotracheitidis<br>(Human parainfluenza virus 2) | PIV4b_Fukushima_OR476_2022 (LC706556) | 5.1                          | 7.6  | NT   | 6.4  | NT   | 7.6  | NT   | 5.9  | 4.0  | 7.2  |
|                                      |                                                                       | PIV2_Fukushima_O13_2018 (LC720864)    | 5.4                          | 7.1  | 6.1  | 7.4  | 6.3  | 8.2  | ND   | 6.6  | 5.9  | 8.1  |
|                                      |                                                                       | PIV2_Fukushima_O33_2018 (LC720865)    | 5.8                          | 7.8  | NT   | 7.7  | NT   | 8.1  | NT   | 9.1  | 5.9  | 9.2  |
|                                      |                                                                       | PIV2_Fukushima_O836_2019 (LC720868)   | 5.2                          | 7.1  | 6.0  | 7.1  | 6.6  | 8.2  | ND   | 5.7  | 4.7  | 7.9  |
|                                      |                                                                       | PIV2_Fukushima_O861_2019 (LC720869)   | 6.2                          | 8.2  | NT   | 8.4  | NT   | 8.7  | NT   | 8.8  | 5.8  | 9.1  |

ND: Not detected, NT: Not tested.

**Table S2.** List of the nucleotide substitutions that found in the P1 solution at >10% frequency, including location, coverage and frequency

| Species                                                                 | Name (Genbank ID)                                                           | Culture (passage)                  | Region             | Gene         | Type      | Reference | Allele | Coverage | Frequency |  |
|-------------------------------------------------------------------------|-----------------------------------------------------------------------------|------------------------------------|--------------------|--------------|-----------|-----------|--------|----------|-----------|--|
| <i>Respirovirus laryngotracheitidis</i><br>(Human parainfluenzavirus 1) | PIV1_Fukushima_O77_2018 (LC764863)                                          | HBTEC-ALI                          | <b>8840</b>        | L            | Silent    | T         | C      | 37658    | 19.6      |  |
|                                                                         |                                                                             | Vero/TMPRSS2                       | <b>8840</b>        | L            | Silent    | T         | C      | 2455     | 19.7      |  |
|                                                                         | PIV1_Fukushima_H171_2018 (LC764862)                                         | HBTEC-ALI                          | <b>3012</b>        | P            | Missense  | A         | G      | 48131    | 25.7      |  |
|                                                                         |                                                                             | Vero/TMPRSS2                       | <b>3012</b>        | P            | Missense  | A         | G      | 924      | 27.7      |  |
|                                                                         | PIV1_Fukushima_O425_2018 (LC764864)                                         | HBTEC-ALI                          | Not detected       |              |           |           |        |          |           |  |
|                                                                         |                                                                             | Vero/TMPRSS2                       | <b>4</b>           | -            | SNV       | G         | A      | 86       | 10.5      |  |
|                                                                         |                                                                             |                                    | <b>7377</b>        | HN           | Silent    | C         | T      | 1107     | 10.0      |  |
|                                                                         |                                                                             |                                    | <b>8448</b>        | HN           | Missense  | T         | A      | 1974     | 17.1      |  |
|                                                                         | PIV1_Fukushima_O503_2019 (LC764865)                                         | HBTEC-ALI                          | <b>5492</b>        | F            | Missense  | C         | T      | 65235    | 84.4      |  |
|                                                                         |                                                                             | Vero/TMPRSS2                       | <b>5492</b>        | F            | Missense  | C         | T      | 1667     | 46.1      |  |
|                                                                         | <i>Orthorubulavirus laryngotracheitidis</i><br>(Human parainfluenzavirus 2) | PIV2_Fukushima_O13_2018 (LC720864) | HBTEC-ALI          | Not detected |           |           |        |          |           |  |
|                                                                         |                                                                             |                                    | Vero/TMPRSS2       | Not detected |           |           |        |          |           |  |
| Vero                                                                    |                                                                             |                                    | Not detected       |              |           |           |        |          |           |  |
| PIV2_Fukushima_O33_2018 (LC720865)                                      |                                                                             | HBTEC-ALI                          | Not detected       |              |           |           |        |          |           |  |
|                                                                         |                                                                             | Vero/TMPRSS2                       | Not detected       |              |           |           |        |          |           |  |
|                                                                         |                                                                             | Vero                               | Not detected       |              |           |           |        |          |           |  |
| PIV2_Fukushima_O836_2019 (LC720868)                                     |                                                                             | HBTEC-ALI                          | <b>13665</b>       | L            | Silent    | T         | C      | 97316    | 20.0      |  |
|                                                                         |                                                                             | Vero/TMPRSS2                       | <b>13665</b>       | L            | Silent    | T         | C      | 46258    | 20.4      |  |
|                                                                         |                                                                             | Vero                               | <b>13665</b>       | L            | Silent    | T         | C      | 4462     | 20.9      |  |
| PIV2_Fukushima_O861_2019 (LC720869)                                     |                                                                             | HBTEC-ALI                          | Not detected       |              |           |           |        |          |           |  |
|                                                                         |                                                                             | Vero/TMPRSS2                       | Not detected       |              |           |           |        |          |           |  |
|                                                                         |                                                                             | Vero                               | Not detected       |              |           |           |        |          |           |  |
| <i>Respirovirus pneumoniae</i><br>(Human parainfluenzavirus 3)          | PIV3_Fukushima_O330_2018 (LC720876)                                         | HBTEC-ALI                          | <b>6184</b>        | F            | Silent    | T         | C      | 46905    | 24.7      |  |
|                                                                         |                                                                             | Vero/TMPRSS2                       | <b>6184</b>        | F            | Silent    | T         | C      | 235      | 20.9      |  |
|                                                                         |                                                                             |                                    | 10610              | L            | Silent    | T         | C      | 128      | 10.2      |  |
|                                                                         | PIV3_Fukushima_O644_2019 (LC720877)                                         | HBTEC-ALI                          | 10                 | -            | SNV       | A         | G      | 24       | 95.8      |  |
|                                                                         |                                                                             | Vero/TMPRSS2                       | 1358               | N            | Silent    | C         | A      | 220      | 10.9      |  |
|                                                                         |                                                                             |                                    | 1463               | N            | Silent    | G         | A      | 173      | 11.6      |  |
|                                                                         |                                                                             |                                    | 2109               | P            | Missense  | C         | T      | 69       | 13.0      |  |
|                                                                         |                                                                             |                                    | 2147               | P            | Missense  | A         | G      | 74       | 12.2      |  |
|                                                                         |                                                                             |                                    | 2539               | P            | Missense  | G         | A      | 141      | 15.6      |  |
|                                                                         |                                                                             |                                    | 3072               | P            | Missense  | C         | T      | 66       | 10.6      |  |
|                                                                         |                                                                             |                                    | <b>3427*3428</b>   | P            | Insertion | -         | A      | 37       | 10.8      |  |
|                                                                         |                                                                             |                                    | 4055               | M            | Silent    | A         | G      | 87       | 11.5      |  |
|                                                                         |                                                                             | 4316                               | M                  | Silent       | G         | A         | 84     | 10.7     |           |  |
|                                                                         |                                                                             | 4769                               | M                  | Silent       | C         | T         | 235    | 13.6     |           |  |
|                                                                         |                                                                             | 4819                               | -                  | SNV          | T         | C         | 223    | 10.8     |           |  |
|                                                                         |                                                                             | 4926                               | -                  | SNV          | T         | G         | 58     | 12.1     |           |  |
|                                                                         |                                                                             | 5029                               | -                  | SNV          | G         | A         | 62     | 11.3     |           |  |
|                                                                         |                                                                             | 5108                               | F                  | Missense     | G         | A         | 41     | 14.6     |           |  |
|                                                                         |                                                                             | 5936                               | F                  | Silent       | T         | C         | 82     | 15.9     |           |  |
|                                                                         |                                                                             | 6885                               | HN                 | Missense     | G         | A         | 145    | 10.3     |           |  |
|                                                                         | 6910                                                                        | HN                                 | Silent             | C            | A         | 149       | 10.7   |          |           |  |
|                                                                         | 7588                                                                        | HN                                 | Silent             | G            | A         | 112       | 10.7   |          |           |  |
|                                                                         | 8687                                                                        | L                                  | Silent             | T            | C         | 92        | 12.0   |          |           |  |
|                                                                         | 9839                                                                        | L                                  | Silent             | C            | T         | 60        | 11.7   |          |           |  |
|                                                                         | 9860                                                                        | L                                  | Silent             | T            | C         | 54        | 13.0   |          |           |  |
|                                                                         | 9971                                                                        | L                                  | Silent             | A            | G         | 39        | 10.3   |          |           |  |
|                                                                         | 10436                                                                       | L                                  | Silent             | A            | G         | 47        | 10.6   |          |           |  |
|                                                                         | 10964                                                                       | L                                  | Silent             | T            | C         | 82        | 12.2   |          |           |  |
|                                                                         | 11858                                                                       | L                                  | Silent             | C            | T         | 83        | 10.8   |          |           |  |
|                                                                         | 11873                                                                       | L                                  | Silent             | C            | T         | 87        | 12.6   |          |           |  |
|                                                                         | 14763                                                                       | L                                  | Missense           | A            | G         | 90        | 11.1   |          |           |  |
|                                                                         |                                                                             | 15441*15442                        | -                  | Insertion    | -         | A         | 33     | 12.1     |           |  |
| PIV3_Fukushima_O726_2019 (LC720879)                                     | HBTEC-ALI                                                                   | <b>6900</b>                        | HN                 | Missense     | T         | C         | 44080  | 11.2     |           |  |
|                                                                         |                                                                             | <b>6964</b>                        | HN                 | Silent       | T         | C         | 81868  | 10.1     |           |  |
|                                                                         | Vero/TMPRSS2                                                                | <b>6900</b>                        | HN                 | Missense     | T         | C         | 2380   | 88.5     |           |  |
|                                                                         |                                                                             | <b>6964</b>                        | HN                 | Silent       | T         | C         | 3494   | 87.8     |           |  |
|                                                                         |                                                                             | 7451                               | HN                 | Missense     | G         | A         | 2481   | 84.4     |           |  |
| <i>Orthorubulavirus hominis</i><br>(Human parainfluenzavirus 4)         | PIV4a_Fukushima_H725_2019 (LC706553)                                        | HBTEC-ALI                          | 4                  | -            | SNV       | T         | A      | 210      | 64.3      |  |
|                                                                         |                                                                             |                                    | <b>5491</b>        | F            | Silent    | T         | C      | 16972    | 13.8      |  |
|                                                                         |                                                                             |                                    | <b>5497</b>        | F            | Silent    | T         | C      | 16487    | 13.4      |  |
|                                                                         |                                                                             |                                    | <b>5821</b>        | F            | Silent    | C         | T      | 31635    | 21.2      |  |
|                                                                         |                                                                             |                                    | <b>9237</b>        | HN           | Missense  | A         | G      | 29676    | 63.0      |  |
|                                                                         |                                                                             |                                    | <b>16235*16236</b> | L            | Insertion | -         | T      | 9072     | 10.9      |  |
|                                                                         | Vero/TMPRSS2                                                                | * Not analyzed                     |                    |              |           |           |        |          |           |  |
|                                                                         | PIV4b_Fukushima_O896_2019 (LC706554)                                        | HBTEC-ALI                          | 3736               | M            | Silent    | G         | A      | 56590    | 74.3      |  |
|                                                                         |                                                                             |                                    | <b>6450</b>        | F            | Silent    | T         | C      | 38750    | 99.7      |  |
|                                                                         |                                                                             |                                    | <b>7536</b>        | -            | SNV       | A         | G      | 29994    | 99.6      |  |
|                                                                         |                                                                             | 9232                               | HN                 | Missense     | G         | A         | 35536  | 70.8     |           |  |
|                                                                         |                                                                             | 17353*17354                        | -                  | Insertion    | -         | CTTGGT    | 1215   | 45.2     |           |  |
|                                                                         |                                                                             | 17353*17354                        | -                  | Insertion    | -         | CTTGGTAT  | 1215   | 18.0     |           |  |
| Vero/TMPRSS2                                                            | * Not analyzed                                                              |                                    |                    |              |           |           |        |          |           |  |
| PIV4b_Fukushima_OR476_2022 (LC706556)                                   | HBTEC-ALI                                                                   | <b>8561</b>                        | HN                 | Silent       | A         | G         | 42320  | 37.9     |           |  |
|                                                                         |                                                                             | <b>9119</b>                        | HN                 | Silent       | C         | T         | 54171  | 36.8     |           |  |
|                                                                         | Vero/TMPRSS2                                                                | <b>2419</b>                        | P                  | Missense     | A         | T         | 2500   | 98.3     |           |  |
|                                                                         | <b>8152</b>                                                                 | HN                                 | Missense           | G            | A         | 3019      | 98.6   |          |           |  |

N; nucleocapsid protein, P; phosphoprotein, M; matrix protein, F; fusion glycoprotein, HN; hemagglutinin-neuraminidase glycoprotein, L; large protein.

**Bold:** quasispecies present in both P0 and P1.

\* Unable to analyze due to insufficient average coverage of <100x.

**Table S3.** List of the nucleotide substitutions that found in the P3 solution at >10% frequency, including location, coverage and frequency

| Species                                                                     | Name (Genbank ID)                    | Culture (passage)                   | Region             | Gene         | Type      | Reference | Allele | Coverage | Frequency |      |
|-----------------------------------------------------------------------------|--------------------------------------|-------------------------------------|--------------------|--------------|-----------|-----------|--------|----------|-----------|------|
| <i>Respirovirus laryngotracheitidis</i><br>(Human parainfluenzavirus 1)     | PIV1_Fukushima_O77_2018 (LC764863)   | HBTEC-ALI                           | 6                  | -            | SNV       | T         | A      | 1535     | 15.3      |      |
|                                                                             |                                      |                                     | <b>8840</b>        | L            | Silent    | T         | C      | 52235    | 23.3      |      |
|                                                                             |                                      | Vero/TMPRSS2                        | 8453               | HN           | Missense  | T         | A      | 2836     | 15.3      |      |
|                                                                             |                                      |                                     | <b>8840</b>        | L            | Silent    | T         | C      | 1583     | 19.1      |      |
|                                                                             | PIV1_Fukushima_H171_2018 (LC764862)  | HBTEC-ALI                           | <b>3012</b>        | P            | Missense  | A         | G      | 35674    | 23.6      |      |
|                                                                             |                                      |                                     | <b>8277</b>        | HN           | Missense  | T         | C      | 89119    | 21.0      |      |
|                                                                             |                                      | Vero/TMPRSS2                        | 515                | N            | Silent    | C         | T      | 6015     | 12.4      |      |
|                                                                             |                                      |                                     | <b>3012</b>        | P            | Missense  | A         | G      | 4581     | 95.4      |      |
|                                                                             |                                      |                                     | 7531               | HN           | Missense  | C         | T      | 2530     | 78.3      |      |
|                                                                             |                                      |                                     | 14571              | L            | Missense  | A         | G      | 4315     | 80.2      |      |
|                                                                             | PIV1_Fukushima_O425_2018 (LC764864)  | HBTEC-ALI                           | <b>4</b>           | -            | SNV       | G         | A      | 1081     | 31.6      |      |
|                                                                             |                                      |                                     | <b>7377</b>        | HN           | Silent    | C         | T      | 33062    | 52.3      |      |
|                                                                             |                                      | Vero/TMPRSS2                        | 939                | N            | Missense  | G         | A      | 17660    | 12.0      |      |
|                                                                             |                                      |                                     | 1977               | P            | Missense  | A         | C      | 15753    | 30.1      |      |
|                                                                             |                                      |                                     | 4273               | M            | Missense  | G         | A      | 11003    | 70.4      |      |
|                                                                             |                                      |                                     | 7291               | HN           | Missense  | T         | C      | 10496    | 16.4      |      |
|                                                                             |                                      |                                     | 8193               | HN           | Silent    | A         | T      | 10802    | 31.9      |      |
|                                                                             |                                      |                                     | 8236               | HN           | Missense  | A         | G      | 11314    | 26.4      |      |
|                                                                             |                                      |                                     | <b>8448</b>        | HN           | Missense  | T         | A      | 9743     | 70.2      |      |
|                                                                             |                                      |                                     | 13979              | L            | Missense  | A         | G      | 5336     | 22.9      |      |
| PIV1_Fukushima_O503_2019 (LC764865)                                         | HBTEC-ALI                            | <b>5492</b>                         | F                  | Missense     | C         | T         | 71828  | 86.9     |           |      |
|                                                                             |                                      | 8449                                | HN                 | Missense     | G         | A         | 87206  | 44.5     |           |      |
|                                                                             | Vero/TMPRSS2                         | 7646                                | HN                 | Missense     | A         | G         | 20711  | 99.6     |           |      |
|                                                                             |                                      | 12450                               | L                  | Silent       | C         | T         | 70974  | 99.8     |           |      |
|                                                                             |                                      | 14055                               | L                  | Missense     | A         | C         | 76960  | 58.0     |           |      |
|                                                                             |                                      | 14454                               | L                  | Missense     | G         | A         | 80190  | 99.8     |           |      |
| <i>Orthorubulavirus laryngotracheitidis</i><br>(Human parainfluenzavirus 2) | PIV2_Fukushima_O13_2018 (LC720864)   | HBTEC-ALI                           | Not detected       |              |           |           |        |          |           |      |
|                                                                             |                                      |                                     | Vero/TMPRSS2       | 9239         | L         | Missense  | G      | A        | 22574     | 10.7 |
|                                                                             |                                      | 14477                               |                    | L            | Missense  | C         | T      | 18091    | 10.5      |      |
|                                                                             |                                      | Vero                                | 14684              | L            | Missense  | G         | A      | 15067    | 12.6      |      |
|                                                                             | 2638                                 |                                     | P                  | Missense     | C         | T         | 18749  | 11.5     |           |      |
|                                                                             | PIV2_Fukushima_O33_2018 (LC720865)   | HBTEC-ALI                           | 14                 | -            | SNV       | T         | C      | 17898    | 19.8      |      |
|                                                                             |                                      |                                     | Vero/TMPRSS2       | 12344        | L         | Missense  | G      | A        | 7955      | 15.4 |
|                                                                             |                                      | 14477                               |                    | L            | Missense  | C         | T      | 9199     | 40.3      |      |
|                                                                             |                                      | 13475                               |                    | L            | Missense  | C         | T      | 21853    | 46.5      |      |
|                                                                             |                                      | 14093                               |                    | L            | Missense  | C         | T      | 18824    | 12.8      |      |
|                                                                             |                                      | PIV2_Fukushima_O836_2019 (LC720868) | HBTEC-ALI          | Not detected |           |           |        |          |           |      |
|                                                                             | Vero/TMPRSS2                         |                                     |                    | 12281        | L         | Missense  | A      | T        | 15943     | 29.5 |
|                                                                             |                                      |                                     | Vero               | 12335        | L         | Missense  | G      | A        | 17986     | 15.1 |
|                                                                             | 2513                                 |                                     |                    | P            | Missense  | G         | A      | 19178    | 14.1      |      |
| PIV2_Fukushima_O861_2019 (LC720869)                                         | HBTEC-ALI                            | 4593                                | M                  | Silent       | T         | C         | 45589  | 17.1     |           |      |
|                                                                             |                                      | 5163                                | F                  | Missense     | C         | T         | 70435  | 18.0     |           |      |
|                                                                             | Vero/TMPRSS2                         | 3832                                | M                  | Missense     | G         | A         | 15355  | 60.7     |           |      |
|                                                                             |                                      | 14518                               | L                  | Missense     | G         | T         | 13340  | 19.8     |           |      |
|                                                                             |                                      | 15292                               | L                  | Silent       | G         | A         | 19092  | 11.4     |           |      |
|                                                                             |                                      | 7404                                | HN                 | Missense     | A         | G         | 23403  | 33.6     |           |      |
|                                                                             | Vero                                 | 13615                               | L                  | Silent       | T         | C         | 43389  | 37.2     |           |      |
|                                                                             |                                      | 14933                               | L                  | Missense     | G         | A         | 31065  | 13.5     |           |      |
|                                                                             |                                      | PIV3_Fukushima_O330_2018 (LC720876) | HBTEC-ALI          | <b>6184</b>  | F         | Silent    | T      | C        | 57749     | 26.1 |
|                                                                             |                                      |                                     |                    | <b>6184</b>  | F         | Silent    | T      | C        | 9691      | 99.6 |
| PIV3_Fukushima_O644_2019 (LC720877)                                         | HBTEC-ALI                            | 10                                  | -                  | SNV          | A         | G         | 26     | 100.0    |           |      |
|                                                                             |                                      | <b>28</b>                           | -                  | SNV          | A         | T         | 2851   | 10.5     |           |      |
|                                                                             | Vero/TMPRSS2                         | 2420                                | P                  | Missense     | G         | A         | 708    | 86.7     |           |      |
|                                                                             |                                      | 5242                                | F                  | Missense     | A         | G         | 473    | 11.6     |           |      |
| PIV3_Fukushima_O726_2019 (LC720879)                                         | HBTEC-ALI                            | 7493                                | HN                 | Missense     | A         | G         | 1048   | 89.5     |           |      |
|                                                                             |                                      | 2090                                | P                  | Missense     | G         | C         | 23768  | 17.2     |           |      |
|                                                                             |                                      | <b>6900</b>                         | HN                 | Missense     | T         | C         | 36053  | 14.4     |           |      |
|                                                                             |                                      | <b>6964</b>                         | HN                 | Silent       | T         | C         | 61608  | 13.3     |           |      |
|                                                                             | Vero/TMPRSS2                         | 12916                               | L                  | Missense     | T         | C         | 23211  | 14.8     |           |      |
|                                                                             |                                      | <b>6900</b>                         | HN                 | Missense     | T         | C         | 4594   | 99.1     |           |      |
|                                                                             |                                      | <b>6964</b>                         | HN                 | Silent       | T         | C         | 6107   | 99.2     |           |      |
|                                                                             |                                      | 7379                                | HN                 | Missense     | A         | G         | 4303   | 97.0     |           |      |
| <i>Orthorubulavirus hominis</i><br>(Human parainfluenzavirus 4)             | PIV4a_Fukushima_H725_2019 (LC706553) | HBTEC-ALI                           | 4                  | -            | SNV       | T         | A      | 481      | 66.1      |      |
|                                                                             |                                      |                                     | <b>9237</b>        | HN           | Missense  | A         | G      | 49843    | 15.2      |      |
|                                                                             |                                      | Vero/TMPRSS2                        | <b>16235*16236</b> | L            | Insertion | -         | T      | 18046    | 12.4      |      |
|                                                                             |                                      |                                     | <b>4110</b>        | M            | Missense  | A         | G      | 5731     | 98.8      |      |
|                                                                             | PIV4b_Fukushima_O896_2019 (LC706554) | HBTEC-ALI                           | <b>5821</b>        | F            | Silent    | C         | T      | 2900     | 99.8      |      |
|                                                                             |                                      |                                     | 8049               | HN           | Missense  | A         | T      | 3007     | 75.4      |      |
|                                                                             |                                      | Vero/TMPRSS2                        | <b>9237</b>        | HN           | Missense  | A         | G      | 3374     | 99.3      |      |
|                                                                             |                                      |                                     | 3736               | M            | Silent    | G         | A      | 62724    | 42.8      |      |

|                                                 |             |    |           |   |        |       |      |
|-------------------------------------------------|-------------|----|-----------|---|--------|-------|------|
|                                                 | <b>6450</b> | F  | Silent    | T | C      | 45282 | 99.6 |
|                                                 | <b>7536</b> | -  | SNV       | A | G      | 33857 | 99.6 |
|                                                 | 9232        | HN | Missense  | G | A      | 41807 | 37.4 |
|                                                 | 17353*17354 | -  | Insertion | - | CTTGGT | 2455  | 42.1 |
| Vero/TMPRSS2                                    | <b>758</b>  | N  | Silent    | G | A      | 2887  | 10.4 |
|                                                 | 2637        | P  | Missense  | T | C      | 3042  | 11.1 |
|                                                 | <b>3454</b> | -  | SNV       | A | G      | 3862  | 10.1 |
|                                                 | 3736        | M  | Silent    | G | A      | 4171  | 30.3 |
|                                                 | <b>4276</b> | M  | Silent    | C | T      | 4870  | 10.3 |
|                                                 | <b>6450</b> | F  | Silent    | T | C      | 2785  | 90.3 |
|                                                 | <b>7536</b> | -  | SNV       | A | G      | 2626  | 88.6 |
|                                                 | 9085        | HN | Missense  | A | G      | 4721  | 46.1 |
|                                                 | 9232        | HN | Missense  | G | A      | 2577  | 26.4 |
|                                                 | 17353*17354 | -  | Insertion | - | CTTGGT | 81    | 23.5 |
| PIV4b_Fukushima_OR476_2022 (LC706556) HBTEC-ALI | <b>8561</b> | HN | Silent    | A | G      | 26679 | 52.8 |
|                                                 | 9028        | HN | Missense  | C | T      | 59792 | 22.5 |
|                                                 | <b>9119</b> | HN | Silent    | C | T      | 58359 | 51.5 |
| Vero/TMPRSS2                                    | <b>2419</b> | P  | Missense  | A | T      | 3156  | 99.2 |
|                                                 | <b>8152</b> | HN | Missense  | G | A      | 3192  | 99.1 |
|                                                 | 9022        | HN | Missense  | C | A      | 3978  | 81.8 |
|                                                 | 10479       | L  | Missense  | G | T      | 1733  | 14.0 |
|                                                 | 16074       | L  | Missense  | G | A      | 2434  | 14.4 |
|                                                 | 17094       | -  | SNV       | A | G      | 13291 | 17.2 |
|                                                 | 17099       | -  | SNV       | A | G      | 13389 | 17.4 |
|                                                 | 17166       | -  | SNV       | A | G      | 12689 | 17.1 |

N; nucleocapsid protein, P; phosphoprotein, M; matrix protein, F; fusion glycoprotein, HN; hemagglutinin-neuraminidase glycoprotein, L; large protein.

**Bold**; quasispecies present in both P0 and P3.

**Table S4.** List of the nucleotide substitutions that found in the P5 solution at >10% frequency, including location, coverage and frequency

| Species                                                                 | Name (Genbank ID)                   | Culture (passage)                                                           | Region                              | Gene         | Type      | Reference | Allele    | Coverage | Frequency |      |      |
|-------------------------------------------------------------------------|-------------------------------------|-----------------------------------------------------------------------------|-------------------------------------|--------------|-----------|-----------|-----------|----------|-----------|------|------|
| <i>Respirovirus laryngotracheitidis</i><br>(Human parainfluenzavirus 1) | PIV1_Fukushima_077_2018 (LC764863)  | HBTEC-ALI                                                                   | 6                                   | -            | SNV       | T         | A         | 174      | 32.8      |      |      |
|                                                                         |                                     |                                                                             | <b>8840</b>                         | L            | Silent    | T         | C         | 4503     | 29.0      |      |      |
|                                                                         |                                     | Vero/TMPRSS2                                                                | 4104                                | M            | Missense  | G         | C         | 1447     | 32.5      |      |      |
|                                                                         |                                     |                                                                             | 7394                                | HN           | Missense  | C         | A         | 1094     | 27.1      |      |      |
|                                                                         |                                     |                                                                             | 8542                                | HN           | Missense  | C         | T         | 634      | 32.3      |      |      |
|                                                                         |                                     |                                                                             | <b>8840</b>                         | L            | Silent    | T         | C         | 710      | 43.2      |      |      |
|                                                                         |                                     | PIV1_Fukushima_H171_2018 (LC764862)                                         | HBTEC-ALI                           | <b>3012</b>  | P         | Missense  | A         | G        | 6620      | 35.9 |      |
|                                                                         |                                     |                                                                             |                                     | 7304         | HN        | Silent    | C         | T        | 8192      | 13.2 |      |
|                                                                         |                                     |                                                                             |                                     | <b>8277</b>  | HN        | Missense  | T         | C        | 10996     | 18.2 |      |
|                                                                         |                                     |                                                                             |                                     | 9592         | L         | Missense  | G         | A        | 7157      | 10.1 |      |
|                                                                         | Vero/TMPRSS2                        |                                                                             | <b>3012</b>                         | P            | Missense  | A         | G         | 2960     | 99.6      |      |      |
|                                                                         |                                     |                                                                             | 7531                                | HN           | Missense  | C         | T         | 2094     | 99.4      |      |      |
|                                                                         |                                     |                                                                             | 8421                                | HN           | Missense  | A         | G         | 4508     | 94.6      |      |      |
|                                                                         |                                     |                                                                             | 14571                               | L            | Missense  | A         | G         | 3076     | 99.4      |      |      |
|                                                                         |                                     |                                                                             | PIV1_Fukushima_0425_2018 (LC764864) | HBTEC-ALI    | <b>4</b>  | -         | SNV       | G        | A         | 101  | 70.3 |
|                                                                         |                                     |                                                                             |                                     |              | 5740^5741 | F         | Insertion | -        | A         | 6475 | 11.8 |
|                                                                         | <b>7377</b>                         | HN                                                                          |                                     |              | Silent    | C         | T         | 3680     | 91.3      |      |      |
|                                                                         | 11352                               | L                                                                           |                                     |              | Silent    | C         | T         | 7564     | 10.4      |      |      |
|                                                                         | Vero/TMPRSS2                        | 939                                                                         |                                     | N            | Missense  | G         | A         | 7350     | 28.7      |      |      |
|                                                                         |                                     | 1977                                                                        |                                     | P            | Missense  | A         | C         | 8947     | 66.6      |      |      |
| 4273                                                                    |                                     | M                                                                           |                                     | Missense     | G         | A         | 5042      | 68.6     |           |      |      |
| 7291                                                                    |                                     | HN                                                                          |                                     | Missense     | T         | C         | 4402      | 29.3     |           |      |      |
| 7292                                                                    |                                     | HN                                                                          |                                     | Missense     | G         | A         | 4417      | 34.2     |           |      |      |
| 8193                                                                    |                                     | HN                                                                          |                                     | Silent       | A         | T         | 4435      | 63.4     |           |      |      |
| 8236                                                                    | HN                                  | Missense                                                                    | A                                   | G            | 5125      | 67.3      |           |          |           |      |      |
| 8281                                                                    | HN                                  | Missense                                                                    | A                                   | G            | 5060      | 28.9      |           |          |           |      |      |
| <b>8448</b>                                                             | HN                                  | Missense                                                                    | T                                   | A            | 4225      | 68.5      |           |          |           |      |      |
| 13979                                                                   | L                                   | Missense                                                                    | A                                   | G            | 2662      | 64.5      |           |          |           |      |      |
| PIV1_Fukushima_0503_2019 (LC764865)                                     | HBTEC-ALI                           | <b>5492</b>                                                                 | F                                   | Missense     | C         | T         | 11498     | 92.0     |           |      |      |
|                                                                         |                                     | 5740^5741                                                                   | F                                   | Insertion    | -         | A         | 7107      | 12.0     |           |      |      |
|                                                                         |                                     | 8449                                                                        | HN                                  | Missense     | G         | A         | 10909     | 74.3     |           |      |      |
|                                                                         | Vero/TMPRSS2                        | 7646                                                                        | HN                                  | Missense     | A         | G         | 1609      | 97.3     |           |      |      |
|                                                                         |                                     | 12450                                                                       | L                                   | Silent       | C         | T         | 11820     | 99.3     |           |      |      |
|                                                                         |                                     | 14055                                                                       | L                                   | Missense     | A         | C         | 12651     | 82.8     |           |      |      |
|                                                                         |                                     | 14454                                                                       | L                                   | Missense     | G         | A         | 13267     | 99.6     |           |      |      |
|                                                                         |                                     | <i>Orthorubulavirus laryngotracheitidis</i><br>(Human parainfluenzavirus 2) | PIV2_Fukushima_013_2018 (LC720864)  | HBTEC-ALI    | 14        | -         | SNV       | T        | C         | 3773 | 49.9 |
|                                                                         |                                     |                                                                             |                                     |              | 14        | -         | SNV       | T        | G         | 3773 | 18.8 |
|                                                                         |                                     |                                                                             |                                     | 7592         | HN        | Missense  | C         | T        | 30933     | 32.2 |      |
| Vero/TMPRSS2                                                            | 7508                                |                                                                             |                                     | HN           | Missense  | A         | G         | 4384     | 28.0      |      |      |
|                                                                         | 8129                                |                                                                             |                                     | HN           | Missense  | C         | T         | 10576    | 22.4      |      |      |
|                                                                         | 10330                               |                                                                             | L                                   | Missense     | T         | C         | 1681      | 28.6     |           |      |      |
| Vero                                                                    | 12344                               |                                                                             | L                                   | Missense     | G         | A         | 2304      | 27.6     |           |      |      |
|                                                                         | 11858                               |                                                                             | L                                   | Missense     | G         | T         | 26939     | 12.0     |           |      |      |
|                                                                         | 12072                               |                                                                             | L                                   | Missense     | G         | A         | 20832     | 21.4     |           |      |      |
|                                                                         | 14477                               |                                                                             | L                                   | Missense     | C         | T         | 16193     | 32.4     |           |      |      |
|                                                                         | PIV2_Fukushima_033_2018 (LC720865)  | HBTEC-ALI                                                                   | 14                                  | -            | SNV       | T         | C         | 4495     | 89.3      |      |      |
| Vero/TMPRSS2                                                            |                                     |                                                                             | 7112                                | HN           | Missense  | T         | C         | 2383     | 17.2      |      |      |
|                                                                         |                                     |                                                                             | 12344                               | L            | Missense  | G         | A         | 797      | 10.9      |      |      |
| Vero                                                                    |                                     | 14477                                                                       | L                                   | Missense     | C         | T         | 1175      | 63.2     |           |      |      |
|                                                                         |                                     | 5531                                                                        | F                                   | Missense     | A         | G         | 8359      | 18.7     |           |      |      |
|                                                                         |                                     | 7535                                                                        | HN                                  | Missense     | G         | A         | 7832      | 72.1     |           |      |      |
|                                                                         |                                     | 13475                                                                       | L                                   | Missense     | C         | T         | 6912      | 74.3     |           |      |      |
|                                                                         |                                     | 14093                                                                       | L                                   | Missense     | C         | T         | 5183      | 23.5     |           |      |      |
| PIV2_Fukushima_0836_2019 (LC720868)                                     | HBTEC-ALI                           | 5                                                                           | -                                   | SNV          | T         | C         | 4576      | 36.5     |           |      |      |
|                                                                         |                                     | 5                                                                           | -                                   | SNV          | T         | G         | 4576      | 39.1     |           |      |      |
|                                                                         |                                     | 2164                                                                        | P                                   | Missense     | C         | T         | 49856     | 39.8     |           |      |      |
|                                                                         |                                     | <b>8441</b>                                                                 | HN                                  | Missense     | T         | A         | 7809      | 19.4     |           |      |      |
|                                                                         |                                     | Vero/TMPRSS2                                                                | 7274                                | HN           | Missense  | G         | A         | 2218     | 71.2      |      |      |
|                                                                         | 12281                               |                                                                             | L                                   | Missense     | A         | T         | 1811      | 88.0     |           |      |      |
|                                                                         | Vero                                | 3857                                                                        | M                                   | Missense     | G         | A         | 33296     | 17.8     |           |      |      |
|                                                                         |                                     | 7337                                                                        | HN                                  | Missense     | A         | G         | 15037     | 82.3     |           |      |      |
|                                                                         |                                     | 11898                                                                       | L                                   | Missense     | G         | T         | 23733     | 82.3     |           |      |      |
|                                                                         |                                     | 15167                                                                       | L                                   | Missense     | G         | A         | 29692     | 83.7     |           |      |      |
| PIV2_Fukushima_0861_2019 (LC720869)                                     |                                     | HBTEC-ALI                                                                   | 9                                   | -            | SNV       | T         | C         | 3343     | 10.0      |      |      |
|                                                                         | 4593                                |                                                                             | M                                   | Silent       | T         | C         | 9818      | 30.1     |           |      |      |
|                                                                         | 5163                                |                                                                             | F                                   | Missense     | C         | T         | 15146     | 30.2     |           |      |      |
|                                                                         | Vero/TMPRSS2                        |                                                                             | 3832                                | M            | Missense  | G         | A         | 1767     | 52.9      |      |      |
|                                                                         |                                     | 7341                                                                        | HN                                  | Missense     | A         | G         | 1363      | 14.0     |           |      |      |
|                                                                         |                                     | 14518                                                                       | L                                   | Missense     | G         | T         | 2910      | 24.5     |           |      |      |
|                                                                         |                                     | 15292                                                                       | L                                   | Silent       | G         | A         | 4417      | 20.5     |           |      |      |
|                                                                         |                                     | 15444                                                                       | L                                   | Deletion     | A         | -         | 3764      | 10.5     |           |      |      |
|                                                                         |                                     | Vero                                                                        | 9                                   | -            | SNV       | T         | C         | 351      | 16.2      |      |      |
|                                                                         | 2536                                |                                                                             | P                                   | Missense     | G         | T         | 2733      | 17.3     |           |      |      |
| 7404                                                                    | HN                                  |                                                                             | Missense                            | A            | G         | 1860      | 94.1      |          |           |      |      |
| 13615                                                                   | L                                   |                                                                             | Silent                              | T            | C         | 3530      | 90.3      |          |           |      |      |
| 14792                                                                   | L                                   |                                                                             | Missense                            | T            | G         | 2355      | 27.6      |          |           |      |      |
| <i>Respirovirus pneumoniae</i>                                          | PIV3_Fukushima_0330_2018 (LC720876) |                                                                             | HBTEC-ALI                           | <b>27^28</b> | -         | Insertion | -         | T        | 311       | 11.6 |      |



(Human parainfluenzavirus 3)

|                                                                 |                                      |                    |             |             |        |        |       |       |      |
|-----------------------------------------------------------------|--------------------------------------|--------------------|-------------|-------------|--------|--------|-------|-------|------|
|                                                                 |                                      | <b>28</b>          | -           | SNV         | A      | T      | 326   | 13.8  |      |
|                                                                 |                                      | <b>6184</b>        | F           | Silent      | T      | C      | 11304 | 29.4  |      |
|                                                                 |                                      | <b>11351</b>       | L           | Silent      | T      | C      | 10246 | 10.5  |      |
|                                                                 | Vero/TMPRSS2                         | <b>6184</b>        | F           | Silent      | T      | C      | 9565  | 99.9  |      |
|                                                                 |                                      | 8471               | HN          | Missense    | A      | G      | 2794  | 99.8  |      |
| PIV3_Fukushima_O644_2019 (LC720877)                             | HBTEC-ALI                            | <b>28</b>          | -           | SNV         | A      | T      | 872   | 10.1  |      |
|                                                                 |                                      | 7383               | HN          | Missense    | C      | T      | 32045 | 31.7  |      |
|                                                                 | Vero/TMPRSS2                         | 1303               | N           | Missense    | G      | T      | 10347 | 42.3  |      |
|                                                                 |                                      | 2420               | P           | Missense    | G      | A      | 6423  | 70.8  |      |
|                                                                 |                                      | 5242               | F           | Missense    | A      | G      | 2900  | 68.4  |      |
|                                                                 |                                      | 7379               | HN          | Missense    | A      | G      | 5216  | 22.2  |      |
|                                                                 |                                      | 7493               | HN          | Missense    | A      | G      | 5932  | 71.1  |      |
|                                                                 |                                      | 8687               | L           | Silent      | T      | C      | 3246  | 23.4  |      |
| PIV3_Fukushima_O726_2019 (LC720879)                             | HBTEC-ALI                            | 2090               | P           | Missense    | G      | C      | 8670  | 52.9  |      |
|                                                                 |                                      | <b>6900</b>        | HN          | Missense    | T      | C      | 14088 | 10.1  |      |
|                                                                 |                                      | 12916              | L           | Missense    | T      | C      | 6180  | 11.2  |      |
|                                                                 | Vero/TMPRSS2                         | <b>6900</b>        | HN          | Missense    | T      | C      | 6565  | 99.8  |      |
|                                                                 |                                      | <b>6964</b>        | HN          | Silent      | T      | C      | 9321  | 99.8  |      |
|                                                                 |                                      | 7379               | HN          | Missense    | A      | G      | 6783  | 98.5  |      |
|                                                                 |                                      | 7451               | HN          | Missense    | G      | A      | 6057  | 99.2  |      |
| <i>Orthorubulavirus hominis</i><br>(Human parainfluenzavirus 4) | PIV4a_Fukushima_H725_2019 (LC706553) | HBTEC-ALI          | <b>5821</b> | F           | Silent | C      | T     | 6797  | 32.5 |
|                                                                 |                                      | <b>9237</b>        | HN          | Missense    | A      | G      | 10019 | 53.5  |      |
|                                                                 |                                      | <b>16235*16236</b> | L           | Insertion   | -      | T      | 2645  | 10.1  |      |
|                                                                 | Vero/TMPRSS2                         | <b>4110</b>        | M           | Missense    | A      | G      | 1434  | 99.4  |      |
|                                                                 |                                      | <b>5821</b>        | F           | Silent      | C      | T      | 679   | 99.7  |      |
|                                                                 |                                      | 8049               | HN          | Missense    | A      | T      | 733   | 84.3  |      |
|                                                                 |                                      | <b>9237</b>        | HN          | Missense    | A      | G      | 1136  | 98.9  |      |
|                                                                 |                                      | 16263              | L           | Missense    | A      | T      | 604   | 14.2  |      |
| PIV4b_Fukushima_O896_2019 (LC706554)                            | HBTEC-ALI                            | 3736               | M           | Silent      | G      | A      | 11956 | 27.7  |      |
|                                                                 |                                      | <b>6450</b>        | F           | Silent      | T      | C      | 7452  | 99.9  |      |
|                                                                 |                                      | <b>7536</b>        | -           | SNV         | A      | G      | 4173  | 99.9  |      |
|                                                                 |                                      | 9232               | HN          | Missense    | G      | A      | 5024  | 24.1  |      |
|                                                                 |                                      | 17353*17354        | -           | Insertion   | -      | CTTGGT | 125   | 39.2  |      |
|                                                                 | Vero/TMPRSS2                         | <b>758</b>         | N           | Silent      | G      | A      | 1247  | 81.5  |      |
|                                                                 |                                      | <b>3454</b>        | -           | SNV         | A      | G      | 3630  | 81.1  |      |
|                                                                 |                                      | <b>4276</b>        | M           | Silent      | C      | T      | 1306  | 84.0  |      |
|                                                                 |                                      | 4430               | M           | Missense    | G      | A      | 2052  | 19.8  |      |
|                                                                 |                                      | <b>6450</b>        | F           | Silent      | T      | C      | 1465  | 18.2  |      |
|                                                                 |                                      | <b>7536</b>        | -           | SNV         | A      | G      | 738   | 17.6  |      |
|                                                                 |                                      | 8555               | HN          | Missense    | C      | T      | 1276  | 61.3  |      |
|                                                                 |                                      | 9031               | HN          | Missense    | A      | G      | 1754  | 12.8  |      |
|                                                                 |                                      | <b>13865</b>       | L           | Silent      | A      | G      | 2418  | 81.3  |      |
|                                                                 |                                      | 17353*17354        | -           | Insertion   | -      | CTTG   | 25    | 88.0  |      |
| PIV4b_Fukushima_OR476_2022 (LC706556)                           | HBTEC-ALI                            | 8154               | HN          | Missense    | G      | A      | 11713 | 36.8  |      |
|                                                                 |                                      | <b>8561</b>        | HN          | Silent      | A      | G      | 4840  | 40.0  |      |
|                                                                 |                                      | 9028               | HN          | Missense    | C      | T      | 9747  | 28.0  |      |
|                                                                 |                                      | <b>9119</b>        | HN          | Silent      | C      | T      | 9813  | 39.9  |      |
|                                                                 | Vero/TMPRSS2                         | <b>2419</b>        | P           | Missense    | A      | T      | 223   | 100.0 |      |
|                                                                 |                                      | 2549*2550          | P           | Insertion * | -      | GG     | 187   | 10.7  |      |
|                                                                 |                                      | <b>8152</b>        | HN          | Missense    | G      | A      | 188   | 99.5  |      |
|                                                                 |                                      | 9022               | HN          | Missense    | C      | A      | 210   | 79.5  |      |
|                                                                 |                                      | 10479              | L           | Missense    | G      | T      | 106   | 11.3  |      |
|                                                                 |                                      | 14160              | L           | Missense    | A      | G      | 157   | 10.2  |      |
|                                                                 |                                      | 16074              | L           | Missense    | G      | A      | 137   | 19.7  |      |
|                                                                 |                                      | 17038              | -           | SNV         | A      | G      | 3016  | 24.0  |      |
|                                                                 |                                      | 17083              | -           | SNV         | A      | G      | 5559  | 28.6  |      |
|                                                                 |                                      | 17094              | -           | SNV         | A      | G      | 5646  | 29.2  |      |
|                                                                 |                                      | 17099              | -           | SNV         | A      | G      | 5716  | 29.6  |      |
|                                                                 |                                      | 17166              | -           | SNV         | A      | G      | 5147  | 33.8  |      |
|                                                                 |                                      | 17212              | -           | SNV         | A      | G      | 2065  | 46.3  |      |
|                                                                 |                                      | 17220..17221       | -           | MNV         | AA     | GG     | 1999  | 45.1  |      |
|                                                                 |                                      | 17231              | -           | SNV         | A      | G      | 1776  | 41.6  |      |
|                                                                 |                                      | 17242              | -           | SNV         | A      | G      | 1399  | 32.0  |      |

N; nucleocapsid protein, P; phosphoprotein, M; matrix protein, F; fusion glycoprotein, HN; hemagglutinin-neuraminidase glycoprotein, L; large protein.

\* RNA editing site, **Bold**; quasispecies present in both P0 and P5.

**Table S5.** List of the quasispecies that originally existed in the P0 inoculum at >1% frequency, including location, coverage and frequency

| Species                                                                     | Name (Genbank ID)                  | Culture (Isolate)                   | Region                              | Gene      | Type *      | Reference | Allele    | Coverage | Frequency |       |      |
|-----------------------------------------------------------------------------|------------------------------------|-------------------------------------|-------------------------------------|-----------|-------------|-----------|-----------|----------|-----------|-------|------|
| <i>Respirovirus laryngotracheitidis</i><br>(Human parainfluenzavirus 1)     | PIV1_Fukushima_O77_2018 (LC764863) | HBTEC-ALI                           | 2596                                | P         | Silent      | C         | T         | 27442    | 2.5       |       |      |
|                                                                             |                                    |                                     | 3734^3735                           | M         | Insertion   | -         | A         | 8508     | 2.7       |       |      |
|                                                                             |                                    |                                     | 4097                                | M         | Silent      | C         | T         | 7582     | 1.6       |       |      |
|                                                                             |                                    |                                     | 4520^4521                           | M         | Insertion   | -         | A         | 14386    | 4.0       |       |      |
|                                                                             |                                    |                                     | 4970^4971                           | -         | Insertion   | -         | A         | 4560     | 1.4       |       |      |
|                                                                             |                                    |                                     | 5408                                | F         | Silent      | C         | T         | 9904     | 2.9       |       |      |
|                                                                             |                                    |                                     | 5745^5746                           | F         | Insertion   | -         | A         | 5300     | 2.0       |       |      |
|                                                                             |                                    |                                     | <b>8840</b>                         | L         | Silent      | T         | C         | 4066     | 19.7      |       |      |
|                                                                             |                                    |                                     | 9090^9091                           | L         | Insertion   | -         | T         | 4357     | 2.0       |       |      |
|                                                                             |                                    |                                     | 9379^9380                           | L         | Insertion   | -         | T         | 2941     | 1.2       |       |      |
|                                                                             |                                    |                                     | 9830^9831                           | L         | Insertion   | -         | T         | 6603     | 3.7       |       |      |
|                                                                             |                                    |                                     | 9908^9909                           | L         | Insertion   | -         | A         | 4979     | 1.3       |       |      |
|                                                                             |                                    |                                     | 10661^10662                         | L         | Insertion   | -         | A         | 4542     | 1.2       |       |      |
|                                                                             |                                    |                                     | 10726^10727                         | L         | Insertion   | -         | T         | 5676     | 3.4       |       |      |
|                                                                             |                                    |                                     | 10745^10746                         | L         | Insertion   | -         | A         | 5638     | 4.0       |       |      |
|                                                                             |                                    |                                     | 11124^11125                         | L         | Insertion   | -         | A         | 9551     | 4.1       |       |      |
|                                                                             |                                    |                                     | 12177^12178                         | L         | Insertion   | -         | A         | 11509    | 1.1       |       |      |
|                                                                             |                                    |                                     | 13693^13694                         | L         | Insertion   | -         | T         | 6559     | 3.5       |       |      |
|                                                                             |                                    |                                     | 13987^13988                         | L         | Insertion   | -         | A         | 4800     | 1.4       |       |      |
|                                                                             |                                    |                                     | PIV1_Fukushima_H171_2018 (LC764862) | HBTEC-ALI | 7           | -         | SNV       | A        | T         | 208   | 1.4  |
|                                                                             |                                    |                                     |                                     |           | <b>3012</b> | P         | Missense  | A        | G         | 3019  | 19.5 |
|                                                                             |                                    |                                     |                                     |           | 3731^3732   | M         | Insertion | -        | A         | 5799  | 2.7  |
|                                                                             |                                    |                                     |                                     |           | 4872^4873   | -         | Insertion | -        | A         | 7438  | 1.1  |
|                                                                             |                                    |                                     |                                     |           | 4967^4968   | -         | Insertion | -        | A         | 5225  | 1.8  |
|                                                                             |                                    |                                     |                                     |           | 5742^5743   | F         | Insertion | -        | A         | 4216  | 2.0  |
|                                                                             |                                    |                                     |                                     |           | <b>8277</b> | HN        | Missense  | T        | C         | 7580  | 2.5  |
|                                                                             |                                    |                                     |                                     |           | 8990        | L         | Silent    | C        | T         | 3855  | 1.1  |
|                                                                             |                                    |                                     |                                     |           | 9087^9088   | L         | Insertion | -        | T         | 3008  | 2.0  |
|                                                                             |                                    |                                     |                                     |           | 9376^9377   | L         | Insertion | -        | T         | 3397  | 1.2  |
| 9827^9828                                                                   | L                                  | Insertion                           |                                     |           | -           | T         | 6291      | 3.1      |           |       |      |
| 9905^9906                                                                   | L                                  | Insertion                           |                                     |           | -           | A         | 3374      | 1.5      |           |       |      |
| 10723^10724                                                                 | L                                  | Insertion                           |                                     |           | -           | T         | 4025      | 1.7      |           |       |      |
| 10742^10743                                                                 | L                                  | Insertion                           |                                     |           | -           | A         | 4080      | 3.7      |           |       |      |
| 11121^11122                                                                 | L                                  | Insertion                           |                                     |           | -           | A         | 6806      | 4.4      |           |       |      |
| 12174^12175                                                                 | L                                  | Insertion                           |                                     |           | -           | A         | 11450     | 1.2      |           |       |      |
| 13984^13985                                                                 | L                                  | Insertion                           |                                     |           | -           | A         | 4161      | 1.2      |           |       |      |
| 14956^14957                                                                 | L                                  | Insertion                           |                                     |           | -           | A         | 1664      | 1.3      |           |       |      |
| 15524^15525                                                                 | -                                  | Insertion                           |                                     |           | -           | A         | 1749      | 1.0      |           |       |      |
| PIV1_Fukushima_O425_2018 (LC764864)                                         | HBTEC-ALI                          | <b>4</b>                            |                                     |           | -           | SNV       | G         | A        | 121       | 2.5   |      |
|                                                                             |                                    | 5                                   | -                                   | SNV       | A           | T         | 125       | 1.6      |           |       |      |
|                                                                             |                                    | 3404                                | P                                   | Silent    | T           | C         | 5525      | 1.4      |           |       |      |
|                                                                             |                                    | 4870^4871                           | -                                   | Insertion | -           | A         | 7819      | 1.2      |           |       |      |
|                                                                             |                                    | 5063                                | -                                   | SNV       | A           | G         | 6208      | 1.5      |           |       |      |
|                                                                             |                                    | <b>7377</b>                         | HN                                  | Silent    | C           | T         | 2644      | 6.2      |           |       |      |
|                                                                             |                                    | <b>8448</b>                         | HN                                  | Missense  | T           | A         | 5551      | 1.0      |           |       |      |
|                                                                             |                                    | 9085^9086                           | L                                   | Insertion | -           | T         | 3390      | 2.2      |           |       |      |
|                                                                             |                                    | 9374^9375                           | L                                   | Insertion | -           | T         | 3516      | 1.4      |           |       |      |
|                                                                             |                                    | 9825^9826                           | L                                   | Insertion | -           | T         | 4268      | 2.1      |           |       |      |
|                                                                             |                                    | 9903^9904                           | L                                   | Insertion | -           | A         | 3022      | 1.2      |           |       |      |
|                                                                             |                                    | 10740^10741                         | L                                   | Insertion | -           | A         | 3553      | 2.7      |           |       |      |
|                                                                             |                                    | 11119^11120                         | L                                   | Insertion | -           | A         | 6049      | 5.1      |           |       |      |
|                                                                             |                                    | 12172^12173                         | L                                   | Insertion | -           | A         | 8861      | 1.1      |           |       |      |
|                                                                             |                                    | 13688^13689                         | L                                   | Insertion | -           | T         | 2455      | 1.7      |           |       |      |
|                                                                             |                                    | PIV1_Fukushima_O503_2019 (LC764865) | HBTEC-ALI                           | 12        | -           | Deletion  | A         | -        | 181       | 1.1   |      |
|                                                                             |                                    |                                     |                                     | 3363      | P           | Missense  | G         | A        | 11994     | 1.0   |      |
| 4515^4516                                                                   | M                                  |                                     |                                     | Insertion | -           | A         | 9474      | 3.8      |           |       |      |
| 4870^4871                                                                   | -                                  |                                     |                                     | Insertion | -           | A         | 8251      | 1.5      |           |       |      |
| <b>5492</b>                                                                 | F                                  |                                     |                                     | Missense  | C           | T         | 7203      | 27.5     |           |       |      |
| 5811^5812                                                                   | F                                  |                                     |                                     | Insertion | -           | A         | 2913      | 1.0      |           |       |      |
| 6887                                                                        | HN                                 |                                     |                                     | Missense  | A           | G         | 8947      | 1.8      |           |       |      |
| 8713                                                                        | -                                  |                                     |                                     | SNV       | A           | G         | 2161      | 2.9      |           |       |      |
| 9085^9086                                                                   | L                                  |                                     |                                     | Insertion | -           | T         | 3210      | 2.7      |           |       |      |
| 9374^9375                                                                   | L                                  |                                     |                                     | Insertion | -           | T         | 3339      | 1.0      |           |       |      |
| 9825^9826                                                                   | L                                  |                                     |                                     | Insertion | -           | T         | 4275      | 2.3      |           |       |      |
| 10740^10741                                                                 | L                                  |                                     |                                     | Insertion | -           | A         | 3623      | 2.9      |           |       |      |
| 11119^11120                                                                 | L                                  |                                     |                                     | Insertion | -           | A         | 5992      | 5.2      |           |       |      |
| 13688^13689                                                                 | L                                  |                                     |                                     | Insertion | -           | T         | 2602      | 2.7      |           |       |      |
| 13982^13983                                                                 | L                                  |                                     |                                     | Insertion | -           | A         | 3453      | 1.3      |           |       |      |
| <i>Orthorubulavirus laryngotracheitidis</i><br>(Human parainfluenzavirus 2) | PIV2_Fukushima_O13_2018 (LC720864) |                                     |                                     | HBTEC-ALI | 1915^1916   | -         | Insertion | -        | A         | 94448 | 2.8  |
|                                                                             |                                    | 3478                                | -                                   |           | SNV         | A         | G         | 74028    | 1.1       |       |      |
|                                                                             |                                    | 4738^4739                           | -                                   |           | Insertion   | -         | A         | 72467    | 2.5       |       |      |
|                                                                             |                                    | 6627^6628                           | -                                   |           | Insertion   | -         | A         | 98817    | 1.7       |       |      |
|                                                                             |                                    | 8740^8741                           | -                                   |           | Insertion   | -         | A         | 51008    | 1.0       |       |      |
|                                                                             |                                    | 10001^10002                         | L                                   |           | Insertion   | -         | T         | 95113    | 1.3       |       |      |
|                                                                             |                                    | 12045^12046                         | L                                   |           | Insertion   | -         | T         | 78038    | 1.1       |       |      |

|                                                                |                                     |                                     |           |              |           |           |       |      |       |     |
|----------------------------------------------------------------|-------------------------------------|-------------------------------------|-----------|--------------|-----------|-----------|-------|------|-------|-----|
|                                                                |                                     | 14709*14710                         | L         | Insertion    | -         | T         | 92305 | 4.6  |       |     |
| PIV2_Fukushima_O33_2018 (LC720865)                             | HBTEC-ALI                           | 3361*3362                           | -         | Insertion    | -         | A         | 66872 | 2.5  |       |     |
|                                                                |                                     | 4027                                | M         | Silent       | G         | A         | 95442 | 5.8  |       |     |
|                                                                |                                     | 4057                                | M         | Silent       | G         | A         | 94052 | 6.3  |       |     |
|                                                                |                                     | 4738*4739                           | -         | Insertion    | -         | A         | 72060 | 2.1  |       |     |
|                                                                |                                     | 10001*10002                         | L         | Insertion    | -         | T         | 78598 | 2.1  |       |     |
|                                                                |                                     | 12045*12046                         | L         | Insertion    | -         | T         | 62884 | 1.3  |       |     |
|                                                                |                                     | 14709*14710                         | L         | Insertion    | -         | T         | 83550 | 6.4  |       |     |
| PIV2_Fukushima_O836_2019 (LC720868)                            | HBTEC-ALI                           | 1906*1907                           | -         | Insertion    | -         | A         | 77058 | 2.6  |       |     |
|                                                                |                                     | 3352*3353                           | -         | Insertion    | -         | A         | 71614 | 2.9  |       |     |
|                                                                |                                     | 4447                                | M         | Silent       | G         | A         | 76786 | 2.0  |       |     |
|                                                                |                                     | 4729*4730                           | -         | Insertion    | -         | A         | 69846 | 2.4  |       |     |
|                                                                |                                     | 6618*6619                           | -         | Insertion    | -         | A         | 75218 | 1.8  |       |     |
|                                                                |                                     | <b>8441</b>                         | HN        | Missense     | T         | A         | 52223 | 3.4  |       |     |
|                                                                |                                     | 8731*8732                           | -         | Insertion    | -         | A         | 30453 | 1.0  |       |     |
|                                                                |                                     | 9992*9993                           | L         | Insertion    | -         | T         | 78521 | 1.4  |       |     |
|                                                                |                                     | 12036*12037                         | L         | Insertion    | -         | T         | 57734 | 1.2  |       |     |
|                                                                |                                     | 12392                               | L         | Missense     | T         | A         | 90046 | 1.2  |       |     |
|                                                                |                                     | 13294                               | L         | Missense     | C         | T         | 67160 | 1.4  |       |     |
|                                                                |                                     | 13665                               | L         | Silent       | T         | C         | 93161 | 19.7 |       |     |
|                                                                |                                     | 14700*14701                         | L         | Insertion    | -         | T         | 76795 | 4.9  |       |     |
|                                                                |                                     | PIV2_Fukushima_O861_2019 (LC720869) | HBTEC-ALI | 1910*1911    | -         | Insertion | -     | A    | 81831 | 2.6 |
|                                                                |                                     |                                     |           | 3356*3357    | -         | Insertion | -     | A    | 90985 | 2.6 |
| 3365*3366                                                      | -                                   |                                     |           | Insertion    | -         | A         | 90054 | 1.8  |       |     |
| 3785                                                           | M                                   |                                     |           | Silent       | G         | A         | 97879 | 3.1  |       |     |
| 4733*4734                                                      | -                                   |                                     |           | Insertion    | -         | A         | 80097 | 2.6  |       |     |
| 5789*5790                                                      | F                                   |                                     |           | Insertion    | -         | T         | 97412 | 1.5  |       |     |
| 6622*6623                                                      | -                                   |                                     |           | Insertion    | -         | A         | 93876 | 1.8  |       |     |
| 9996*9997                                                      | L                                   |                                     |           | Insertion    | -         | T         | 93221 | 1.4  |       |     |
| 12040*12041                                                    | L                                   |                                     |           | Insertion    | -         | T         | 70787 | 1.1  |       |     |
| 14704*14705                                                    | L                                   |                                     |           | Insertion    | -         | T         | 91656 | 4.7  |       |     |
| <i>Respirovirus pneumoniae</i><br>(Human parainfluenzavirus 3) | PIV3_Fukushima_O330_2018 (LC720876) |                                     |           | <b>27*28</b> | -         | Insertion | -     | T    | 542   | 1.1 |
|                                                                |                                     |                                     |           |              | <b>28</b> | -         | SNV   | A    | T     | 559 |
|                                                                |                                     |                                     |           | 2497*2498    | P         | Insertion | -     | A    | 18132 | 2.9 |
|                                                                |                                     | 3873                                | M         | Missense     | G         | A         | 11374 | 1.1  |       |     |
|                                                                |                                     | 4944*4945                           | -         | Insertion    | -         | A         | 16966 | 3.6  |       |     |
|                                                                |                                     | <b>6184</b>                         | F         | Silent       | T         | C         | 15163 | 14.8 |       |     |
|                                                                |                                     | 6723*6724                           | -         | Insertion    | -         | A         | 5497  | 1.3  |       |     |
|                                                                |                                     | 6774*6775                           | -         | Insertion    | -         | A         | 6015  | 1.8  |       |     |
|                                                                |                                     | 6869                                | HN        | Missense     | G         | A         | 13239 | 1.3  |       |     |
|                                                                |                                     | 9721*9722                           | L         | Insertion    | -         | T         | 6625  | 1.4  |       |     |
|                                                                |                                     | 10637*10638                         | L         | Insertion    | -         | A         | 8089  | 1.0  |       |     |
|                                                                |                                     | <b>11351</b>                        | L         | Silent       | T         | C         | 12304 | 1.5  |       |     |
|                                                                |                                     | 11614*11615                         | L         | Insertion    | -         | T         | 13578 | 1.7  |       |     |
|                                                                |                                     | 12069*12070                         | L         | Insertion    | -         | A         | 12822 | 1.1  |       |     |
|                                                                |                                     | 13038                               | L         | SNV          | G         | A         | 9293  | 2.4  |       |     |
|                                                                |                                     | 15157*15158                         | L         | Insertion    | -         | A         | 6975  | 1.2  |       |     |
|                                                                |                                     | 15175                               | L         | SNV          | A         | G         | 6658  | 3.2  |       |     |
|                                                                |                                     | 15424*15425                         | -         | Insertion    | -         | AT        | 3561  | 1.6  |       |     |
|                                                                |                                     | PIV3_Fukushima_O644_2019 (LC720877) | HBTEC-ALI | 27*28        | -         | Insertion | -     | T    | 272   | 4.8 |
|                                                                |                                     |                                     |           | <b>28</b>    | -         | SNV       | A     | T    | 273   | 3.7 |
|                                                                |                                     |                                     |           | 2497*2498    | P         | Insertion | -     | A    | 10855 | 3.0 |
| 3427*3428                                                      | P                                   |                                     |           | Insertion    | -         | A         | 5493  | 1.0  |       |     |
| 4944*4945                                                      | -                                   |                                     |           | Insertion    | -         | A         | 6839  | 2.3  |       |     |
| 6723*6724                                                      | -                                   |                                     |           | Insertion    | -         | A         | 2500  | 1.6  |       |     |
| 9721*9722                                                      | L                                   |                                     |           | Insertion    | -         | T         | 2965  | 2.0  |       |     |
| 10637*10638                                                    | L                                   |                                     |           | Insertion    | -         | A         | 4040  | 1.2  |       |     |
| 11614*11615                                                    | L                                   |                                     |           | Insertion    | -         | T         | 6727  | 1.7  |       |     |
| 12069*12070                                                    | L                                   |                                     |           | Insertion    | -         | A         | 6371  | 1.3  |       |     |
| 12710                                                          | L                                   |                                     |           | Silent       | C         | T         | 3621  | 2.0  |       |     |
| 15157*15158                                                    | L                                   |                                     |           | Insertion    | -         | A         | 3252  | 1.6  |       |     |
| PIV3_Fukushima_O726_2019 (LC720879)                            | HBTEC-ALI                           |                                     |           | 27*28        | -         | Insertion | -     | T    | 158   | 1.9 |
|                                                                |                                     | <b>28</b>                           | -         | SNV          | A         | T         | 160   | 2.5  |       |     |
|                                                                |                                     | 2497*2498                           | P         | Insertion    | -         | A         | 4646  | 3.3  |       |     |
|                                                                |                                     | 2652                                | P         | Missense     | A         | G         | 8659  | 3.4  |       |     |
|                                                                |                                     | 3427*3428                           | P         | Insertion    | -         | A         | 2723  | 1.4  |       |     |
|                                                                |                                     | 4944*4945                           | -         | Insertion    | -         | A         | 3700  | 2.9  |       |     |
|                                                                |                                     | 5052                                | -         | SNV          | C         | T         | 3341  | 1.5  |       |     |
|                                                                |                                     | 6723*6724                           | -         | Insertion    | -         | A         | 1393  | 1.5  |       |     |
|                                                                |                                     | <b>6900</b>                         | HN        | Missense     | T         | C         | 2748  | 6.1  |       |     |
|                                                                |                                     | <b>6964</b>                         | HN        | Silent       | T         | C         | 3177  | 5.3  |       |     |
|                                                                |                                     | 7331                                | HN        | Missense     | C         | T         | 3003  | 4.9  |       |     |
|                                                                |                                     | 10517                               | L         | Silent       | T         | C         | 1712  | 1.7  |       |     |
|                                                                |                                     | 14810                               | L         | Silent       | C         | T         | 2128  | 2.8  |       |     |

|                                 |                                      |                    |    |             |    |    |       |      |
|---------------------------------|--------------------------------------|--------------------|----|-------------|----|----|-------|------|
|                                 |                                      | 15157^15158        | L  | Insertion   | -  | A  | 1834  | 1.3  |
|                                 |                                      | 15424^15425        | -  | Insertion   | -  | AT | 853   | 1.8  |
| <i>Orthorubulavirus hominis</i> | PIV4a_Fukushima_H725_2019 (LC706553) | 9                  | -  | Deletion    | A  | -  | 1816  | 2.7  |
| (Human parainfluenzavirus 4)    |                                      | 30^31              | -  | Insertion   | -  | A  | 6067  | 1.5  |
|                                 |                                      | 932^933            | N  | Insertion   | -  | AT | 15034 | 1.3  |
|                                 |                                      | 1854^1855          | -  | Insertion   | -  | A  | 19703 | 2.4  |
|                                 |                                      | 2008^2009          | -  | Insertion   | -  | A  | 9606  | 1.2  |
|                                 |                                      | 2465^2466          | P  | Insertion   | -  | A  | 8922  | 3.1  |
|                                 |                                      | 2500^2501          | P  | Insertion   | -  | A  | 10596 | 2.0  |
|                                 |                                      | 3542^3543          | -  | Insertion   | -  | A  | 14136 | 5.7  |
|                                 |                                      | 3692^3693          | M  | Insertion   | -  | A  | 8809  | 1.5  |
|                                 |                                      | <b>4110</b>        | M  | Missense    | A  | G  | 14273 | 1.3  |
|                                 |                                      | 4657^4658          | M  | Insertion   | -  | A  | 17216 | 2.5  |
|                                 |                                      | 5105^5106          | -  | Insertion   | -  | A  | 14484 | 2.7  |
|                                 |                                      | 5491               | F  | Silent      | T  | C  | 8218  | 1.7  |
|                                 |                                      | 5497               | F  | Silent      | T  | C  | 8170  | 1.8  |
|                                 |                                      | 5656^5657          | F  | Insertion   | -  | A  | 7514  | 4.5  |
|                                 |                                      | <b>5821</b>        | F  | Silent      | C  | T  | 9096  | 15.2 |
|                                 |                                      | 6889               | -  | SNV         | C  | T  | 22006 | 1.2  |
|                                 |                                      | 6939               | -  | SNV         | C  | T  | 21380 | 2.4  |
|                                 |                                      | 7041^7042          | -  | Insertion   | -  | A  | 23095 | 5.8  |
|                                 |                                      | 7052               | -  | SNV         | A  | G  | 26241 | 1.3  |
|                                 |                                      | 7197               | -  | SNV         | C  | G  | 23030 | 1.5  |
|                                 |                                      | 7276^7277          | -  | Insertion   | -  | A  | 20924 | 1.7  |
|                                 |                                      | 7555^7556          | -  | Insertion   | -  | A  | 11292 | 8.2  |
|                                 |                                      | 8337^8338          | HN | Insertion   | -  | A  | 14582 | 2.5  |
|                                 |                                      | 8574^8575          | HN | Insertion   | -  | T  | 10926 | 1.1  |
|                                 |                                      | 8581               | HN | SNV         | C  | T  | 10577 | 1.7  |
|                                 |                                      | <b>9237</b>        | HN | Missense    | A  | G  | 10754 | 35.2 |
|                                 |                                      | 9284               | HN | Missense    | C  | T  | 11068 | 3.3  |
|                                 |                                      | 9819^9820          | -  | Insertion   | -  | A  | 7865  | 1.5  |
|                                 |                                      | 9958^9959          | -  | Insertion   | -  | A  | 11857 | 1.1  |
|                                 |                                      | 10320^10321        | L  | Insertion   | -  | T  | 8518  | 1.4  |
|                                 |                                      | 10421^10422        | L  | Insertion   | -  | T  | 10277 | 1.3  |
|                                 |                                      | 11075^11076        | L  | Insertion   | -  | T  | 13719 | 1.9  |
|                                 |                                      | 11238^11239        | L  | Insertion   | -  | T  | 10227 | 1.2  |
|                                 |                                      | 12592^12593        | L  | Insertion   | -  | T  | 9940  | 2.1  |
|                                 |                                      | 15894^15895        | L  | Insertion   | -  | A  | 11571 | 3.1  |
|                                 |                                      | <b>16235^16236</b> | L  | Insertion   | -  | T  | 9093  | 8.2  |
|                                 |                                      | 16745^16746        | L  | Insertion   | -  | T  | 8652  | 3.8  |
|                                 |                                      | 16960^16961        | -  | Insertion   | -  | A  | 4125  | 1.8  |
|                                 |                                      | 17039^17040        | -  | Insertion   | -  | A  | 3854  | 2.4  |
|                                 | PIV4b_Fukushima_O896_2019 (LC706554) | <b>758</b>         | N  | Silent      | G  | A  | 157   | 3.2  |
|                                 |                                      | 1603               | N  | Missense    | A  | G  | 243   | 1.6  |
|                                 |                                      | 1691               | N  | Missense    | T  | C  | 258   | 7.0  |
|                                 |                                      | 2496^2497          | P  | Insertion   | -  | A  | 115   | 2.6  |
|                                 |                                      | 2547^2548          | P  | Insertion * | -  | G  | 130   | 1.5  |
|                                 |                                      | 2547^2548          | P  | Insertion * | -  | GG | 130   | 3.1  |
|                                 |                                      | 2556               | P  | Missense    | T  | C  | 166   | 13.9 |
|                                 |                                      | 2601..2602         | P  | Deletion    | AA | -  | 188   | 1.1  |
|                                 |                                      | 2870^2871          | P  | Insertion   | -  | A  | 101   | 4.0  |
|                                 |                                      | 3003               | P  | Silent      | T  | C  | 100   | 2.0  |
|                                 |                                      | 3313               | -  | SNV         | G  | T  | 249   | 4.4  |
|                                 |                                      | 3423               | -  | SNV         | A  | G  | 201   | 1.5  |
|                                 |                                      | <b>3454</b>        | -  | SNV         | A  | G  | 190   | 41.1 |
|                                 |                                      | 3688^3689          | M  | Insertion   | -  | A  | 121   | 5.8  |
|                                 |                                      | <b>4276</b>        | M  | Silent      | C  | T  | 116   | 2.6  |
|                                 |                                      | 5040               | -  | SNV         | A  | G  | 295   | 5.1  |
|                                 |                                      | 5101^5102          | -  | Insertion   | -  | A  | 240   | 2.1  |
|                                 |                                      | 5550               | F  | Silent      | A  | G  | 148   | 1.4  |
|                                 |                                      | 5652^5653          | F  | Insertion   | -  | A  | 157   | 1.9  |
|                                 |                                      | <b>6450</b>        | F  | Silent      | T  | C  | 94    | 19.1 |
|                                 |                                      | 6999               | -  | SNV         | A  | G  | 361   | 1.1  |
|                                 |                                      | 7044^7045          | -  | Insertion   | -  | A  | 353   | 2.3  |
|                                 |                                      | 7266^7267          | -  | Insertion   | -  | A  | 140   | 3.6  |
|                                 |                                      | 7267               | -  | Deletion    | A  | -  | 141   | 1.4  |
|                                 |                                      | <b>7536</b>        | -  | SNV         | A  | G  | 55    | 18.2 |
|                                 |                                      | 8339               | HN | Missense    | C  | G  | 108   | 1.9  |
|                                 |                                      | 9025               | HN | Missense    | C  | T  | 125   | 9.6  |

|                                                 |              |    |           |   |   |      |      |
|-------------------------------------------------|--------------|----|-----------|---|---|------|------|
|                                                 | 9030^9031    | HN | Insertion | - | A | 122  | 1.6  |
|                                                 | 9452         | -  | SNV       | A | G | 119  | 2.5  |
|                                                 | 9809^9810    | -  | Insertion | - | A | 134  | 3.0  |
|                                                 | 10411^10412  | L  | Insertion | - | T | 69   | 2.9  |
|                                                 | 12095        | L  | Silent    | C | T | 88   | 2.3  |
|                                                 | 12284        | L  | Silent    | A | G | 72   | 2.8  |
|                                                 | 12559^12560  | L  | Insertion | - | T | 93   | 2.2  |
|                                                 | 12582^12583  | L  | Insertion | - | T | 87   | 2.3  |
|                                                 | <b>13865</b> | L  | Silent    | A | G | 113  | 37.2 |
|                                                 | 14232        | L  | Missense  | T | C | 72   | 2.8  |
|                                                 | 16813        | L  | Missense  | A | G | 134  | 1.5  |
| PIV4b_Fukushima_OR476_2022 (LC706556) HBTEC-ALI | 7            | -  | SNV       | A | G | 716  | 1.3  |
|                                                 | <b>2419</b>  | P  | Missense  | A | T | 2227 | 2.2  |
|                                                 | 2498^2499    | P  | Insertion | - | A | 2010 | 2.1  |
|                                                 | 2872^2873    | P  | Insertion | - | A | 2123 | 2.0  |
|                                                 | 3367         | -  | SNV       | C | T | 7672 | 2.0  |
|                                                 | 3540^3541    | -  | Insertion | - | A | 2407 | 3.4  |
|                                                 | 4655^4656    | M  | Insertion | - | A | 2806 | 3.2  |
|                                                 | 4801         | -  | SNV       | C | T | 5758 | 1.2  |
|                                                 | 5654^5655    | F  | Insertion | - | A | 1844 | 4.6  |
|                                                 | 7196         | -  | SNV       | C | T | 5243 | 1.1  |
|                                                 | 7268^7269    | -  | Insertion | - | A | 2842 | 3.8  |
|                                                 | 7321         | -  | SNV       | C | T | 3444 | 1.7  |
|                                                 | <b>8152</b>  | HN | Missense  | G | A | 2762 | 2.5  |
|                                                 | <b>8561</b>  | HN | Silent    | A | G | 1241 | 37.4 |
|                                                 | 8566^8567    | HN | Insertion | - | T | 1181 | 1.0  |
|                                                 | 8573         | HN | Silent    | C | T | 1158 | 1.5  |
|                                                 | 8775         | HN | Missense  | C | A | 1799 | 1.4  |
|                                                 | <b>9119</b>  | HN | Silent    | C | T | 1785 | 36.5 |
|                                                 | 10273        | L  | Silent    | A | G | 1835 | 3.4  |
|                                                 | 10312^10313  | L  | Insertion | - | T | 2020 | 2.2  |
|                                                 | 10413^10414  | L  | Insertion | - | T | 1380 | 1.6  |
|                                                 | 10618^10619  | L  | Insertion | - | A | 1397 | 1.1  |
|                                                 | 12561^12562  | L  | Insertion | - | T | 1506 | 2.5  |
|                                                 | 12562        | L  | Deletion  | T | - | 1544 | 1.2  |
|                                                 | 12584^12585  | L  | Insertion | - | T | 1683 | 1.8  |
|                                                 | 15886^15887  | L  | Insertion | - | A | 1863 | 3.1  |
|                                                 | 16952^16953  | -  | Insertion | - | A | 1512 | 1.5  |

N; nucleocapsid protein, P; phosphoprotein, M; matrix protein, F; fusion glycoprotein, HN; hemagglutinin-neuraminidase glycoprotein, L; large protein.

\* RNA editing site, **Bold**; quasispecies present in both P0 and P5.

**Table S6.** Residues of the cleavage site in fusion proteins

| Isolate                               | P7  | P6    | P5  | P4  | P3 | P2  | P1 | P'1 | P'2 | P'3 |
|---------------------------------------|-----|-------|-----|-----|----|-----|----|-----|-----|-----|
| HPIV1                                 | A/N | D     | N/V | P   | Q  | S/T | R  | F   | F   | G   |
| PIV1_Fukushima_O77_2018 (LC764863)    | N   | D     | N   | P   | Q  | T   | R  | F   | F   | G   |
| PIV1_Fukushima_H171_2018 (LC764862)   | N   | D     | N   | P   | Q  | T   | R  | F   | F   | G   |
| PIV1_Fukushima_O425_2018 (LC764864)   | N   | D     | N   | P   | Q  | T   | R  | F   | F   | G   |
| PIV1_Fukushima_O503_2019 (LC764865)   | N   | D     | N   | P   | Q  | T   | R  | F   | F   | G   |
| HPIV2 (trypsin dependent)             | T   | A/K/T | P/T | R   | Q  | E   | R  | F   | A   | G   |
| HPIV2 (trypsin independent)           | T   | K/T   | T   | R   | Q  | K   | R  | F   | A   | G   |
| PIV2_Fukushima_O13_2018 (LC720864)    | T   | K     | P   | R   | R  | E   | R  | F   | A   | G   |
| PIV2_Fukushima_O33_2018 (LC720865)    | T   | K     | P   | R   | R  | E   | R  | F   | A   | G   |
| PIV2_Fukushima_O836_2019 (LC720868)   | T   | K     | P   | R   | R  | E   | R  | F   | A   | G   |
| PIV2_Fukushima_O861_2019 (LC720869)   | T   | K     | P   | R   | R  | E   | R  | F   | A   | G   |
| HPIV3 (trypsin dependent)             | T   | D     | P   | R   | T  | E   | R  | F   | F   | G   |
| HPIV3 (trypsin independent)           | T   | D/N   | P   | R/T | T  | K/R | R  | F   | F   | G   |
| PIV3_Fukushima_O330_2018 (LC720876)   | T   | D     | P   | R   | T  | E   | R  | F   | F   | G   |
| PIV3_Fukushima_O644_2019 (LC720877)   | T   | D     | P   | R   | T  | E   | R  | F   | F   | G   |
| PIV3_Fukushima_O726_2019 (LC720879)   | T   | D     | P   | R   | T  | E   | R  | F   | F   | G   |
| HPIV4a                                | S   | S     | E   | I   | Q  | S   | R  | F   | F   | G   |
| PIV4a_Fukushima_H725_2019 (LC706553)  | S   | S     | E   | V   | Q  | S   | R  | F   | F   | G   |
| HPIV4b                                | S   | S     | E   | I   | Q  | S   | R  | F   | F   | G   |
| PIV4b_Fukushima_O896_2019 (LC706554)  | S   | S     | E   | I   | Q  | S   | R  | F   | F   | G   |
| PIV4b_Fukushima_OR476_2022 (LC706556) | S   | S     | E   | I   | Q  | S   | R  | F   | F   | G   |

Residues from previous reports are shown, and in gray if they are identical to those of the isolates used in this study.

(Abe M, Tahara M, Sakai K, Yamaguchi H, Kanou K, Shirato K, Kawase M, Noda M, Kimura H, Matsuyama S, Fukuhara H, Mizuta K, Maenaka K, Ami Y, Esumi M, Kato A, Takeda M. 2013. TMPRSS2 is an activating protease for respiratory parainfluenza viruses. *J Virol* 87:11930-5.)
